# Supplementary material for: Phosphatidylserine-exposing extracellular vesicles in body fluids are an innate defence against apoptotic mimicry viral pathogens
Source: Springer Nature journal article supplement (doi:10.1038/s41564-024-01637-6), 2024-03-25
Supplement: MOESM1 [file 41564_2024_1637_MOESM1_ESM.pdf]

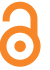

---

# Phosphatidylserine-exposing extracellular vesicles in body fluids are an innate defence against apoptotic mimicry viral pathogens

---

In the format provided by the authors and unedited

---

**Supplementary Table 1: Shedding into body fluids and modes of human to human transmission for viruses using or not using viral apoptotic mimicry. VAM – using viral apoptotic mimicry as a primary entry mechanism.**

| Virus       | VAM                 | Sexual transmission       |                                 | Oral transmission       |                              | Blood-borne          |                                                       |
|-------------|---------------------|---------------------------|---------------------------------|-------------------------|------------------------------|----------------------|-------------------------------------------------------|
|             |                     | Semen                     | Frequency                       | Saliva                  | Frequency                    | Blood                | Frequency                                             |
| Zika        | Yes <sup>1</sup>    | Yes <sup>2-4</sup>        | Rare <sup>2,4</sup>             | Yes <sup>4</sup>        | None reported                | Yes <sup>5</sup>     | Dominant via mosquito vectors <sup>6</sup>            |
| Dengue      | Yes <sup>1,10</sup> | Yes <sup>11</sup>         | Anecdotally <sup>11</sup>       | Yes <sup>12,13</sup>    | None reported                | Yes <sup>14</sup>    | Dominant via mosquito vectors <sup>6,15</sup>         |
| West Nile   | Yes <sup>1,10</sup> | None reported             | None reported                   | Yes <sup>13</sup>       | None reported                | Low <sup>16</sup>    | Dead end hosts, transfusion possible <sup>16,17</sup> |
| Chikungunya | Yes <sup>1,10</sup> | Yes <sup>3</sup>          | None reported <sup>3</sup>      | Yes <sup>13,19</sup>    | None reported                | Yes <sup>20</sup>    | Dominant via mosquito vectors <sup>15,21</sup>        |
| Ebola       | Yes <sup>1,10</sup> | Yes <sup>3</sup>          | Rare <sup>23</sup>              | Yes <sup>13,23,24</sup> | Possible route <sup>23</sup> | Yes <sup>23,24</sup> | Possible route <sup>23</sup>                          |
| SARS-CoV-2  | No <sup>1,25</sup>  | Anecdotally <sup>26</sup> | None reported                   | Yes <sup>27</sup>       | Common <sup>28,29</sup>      | Low <sup>30</sup>    | No evidence <sup>31</sup>                             |
| HIV-1       | No <sup>1</sup>     | Yes <sup>3</sup>          | Dominant route <sup>34</sup>    | Yes <sup>35</sup>       | Unlikely <sup>36</sup>       | Yes <sup>36</sup>    | Possible route <sup>34,36</sup>                       |
| CMV         | No <sup>39</sup>    | Yes <sup>3</sup>          | Possible route <sup>40</sup>    | Yes <sup>13,41</sup>    | Common route <sup>41</sup>   | Yes <sup>41</sup>    | Possible route <sup>41,42</sup>                       |
| HSV-1       | No <sup>10,43</sup> | Yes <sup>3</sup>          | Possible route <sup>44</sup>    | Yes <sup>45 13</sup>    | Dominant route <sup>45</sup> | Low <sup>42</sup>    | No evidence <sup>42</sup>                             |
| HSV-2       | No <sup>43</sup>    | Yes <sup>3</sup>          | Dominant route <sup>44</sup>    | Yes <sup>13</sup>       | Possible route <sup>44</sup> | Low <sup>42</sup>    | No evidence <sup>42</sup>                             |
| Hepatitis C | No <sup>46</sup>    | Yes <sup>3</sup>          | Possible route <sup>47-49</sup> | Yes <sup>13,50</sup>    | None reported <sup>50</sup>  | Yes <sup>51</sup>    | Possible route <sup>51</sup>                          |

| Virus       | VAM                 | Breast feeding            |                                 | Urine                |                              |
|-------------|---------------------|---------------------------|---------------------------------|----------------------|------------------------------|
|             |                     | Milk                      | Frequency                       | Urine                | Frequency                    |
| Zika        | Yes <sup>1</sup>    | Yes <sup>7</sup>          | Rare <sup>4,8,9</sup>           | Yes <sup>5</sup>     | None reported                |
| Dengue      | Yes <sup>1,10</sup> | Yes <sup>7</sup>          | None reported <sup>7</sup>      | Yes <sup>11</sup>    | None reported                |
| West Nile   | Yes <sup>1,10</sup> | Yes <sup>7</sup>          | None reported <sup>7</sup>      | Yes <sup>18</sup>    | None reported                |
| Chikungunya | Yes <sup>1,10</sup> | Anecdotally <sup>22</sup> | None reported                   | Yes <sup>19</sup>    | None reported                |
| Ebola       | Yes <sup>1,10</sup> | Yes <sup>23,24</sup>      | Rare <sup>23</sup>              | Yes <sup>23,24</sup> | Possible route <sup>23</sup> |
| SARS-CoV-2  | No <sup>1,25</sup>  | Yes <sup>32</sup>         | None reported <sup>32</sup>     | Yes <sup>26,33</sup> | None reported                |
| HIV-1       | No <sup>1</sup>     | Yes <sup>37</sup>         | Possible route <sup>37,38</sup> | Yes <sup>36</sup>    | Unlikely <sup>36</sup>       |
| CMV         | No <sup>39</sup>    | Yes <sup>41</sup>         | Possible route <sup>38,41</sup> | Yes <sup>41</sup>    | Possible route <sup>41</sup> |
| HSV-1       | No <sup>10,43</sup> | n/a                       | None reported                   | None reported        | None reported                |
| HSV-2       | No <sup>43</sup>    | n/a                       | None reported                   | None reported        | None reported                |
| Hepatitis C | No <sup>46</sup>    | Yes <sup>52</sup>         | Rare <sup>52</sup>              | Yes <sup>53</sup>    | None reported                |

**Supplementary Table 2: Purified EVs from body fluids and cell culture supernatant, related to Figure 3.** The number of preparations refers to unique isolation procedures performed per source; for sources with multiple preparations the range of donors, volume, particle concentration, concentration factor and particle recovery are given. Recovery of particles is calculated by NTA-tracked particles in the source fluid (after centrifugation) and the final EV preparation; due to presence of non-EV-particles especially in the source fluid which may be tracked by NTA, this does not necessarily reflect the recovery of EVs specifically. N/A = not applicable. \* semen used for preparation of seminal plasma was obtained as excess material from a fertility clinic as unlabeled aliquots; the number of donors shown assumes that all aliquots are from separate donors, but repeated donations and multiple aliquots per donation are possible and cannot be verified.

| Source             | Isolations | Donors    | Source volume [ml] | Particles/ml source        | Particles/ml EV preparation | Conc. by volume | Recovery particles [%] |
|--------------------|------------|-----------|--------------------|----------------------------|-----------------------------|-----------------|------------------------|
| <b>Semen</b>       | 3          | 35 - 100* | 33 - 90            | $3.7 - 4.0 \times 10^{12}$ | $4.3 - 9.9 \times 10^{12}$  | 8 - 11x         | 10.3 - 25.2            |
| <b>Saliva</b>      | 5          | 9 - 10    | 100 - 300          | $3.3 - 8.5 \times 10^{10}$ | $1.7 - 9.9 \times 10^{11}$  | 100 - 429x      | 1.6 - 18.2             |
| <b>Urine</b>       | 1          | 6         | 3,125              | $8.2 \times 10^9$          | $4.4 \times 10^{12}$        | 2,232x          | 23.9                   |
| <b>Breast milk</b> | 1          | 1         | 49                 | $2.3 \times 10^{12}$       | $2.5 \times 10^{13}$        | 33x             | 33.2                   |
| <b>Blood</b>       | 3          | N/A       | 20 - 40            | $2.2 \times 10^{12}$       | $1.3 \times 10^{12}$        | 20x             | 3.0                    |

## References

1. Bohan, D. & Maury, W. Enveloped RNA virus utilization of phosphatidylserine receptors: Advantages of exploiting a conserved, widely available mechanism of entry. *PLOS Pathog.* **17**, e1009899 (2021).
2. Counotte, M. J. *et al.* Sexual transmission of Zika virus and other flaviviruses: A living systematic review. *PLOS Med.* **15**, e1002611 (2018).
3. Salam, A. P. & Horby, P. W. The Breadth of Viruses in Human Semen. *Emerg. Infect. Dis.* **23**, 1922–1924 (2017).
4. Grischott, F., Puhan, M., Hatz, C. & Schlagenhauf, P. Non-vector-borne transmission of Zika virus: A systematic review. *Travel Med. Infect. Dis.* **14**, 313–330 (2016).
5. Paz-Bailey, G. *et al.* Persistence of Zika Virus in Body Fluids — Final Report. *N. Engl. J. Med.* **379**, 1234–1243 (2018).
6. Pierson, T. C. & Diamond, M. S. The continued threat of emerging flaviviruses. *Nat. Microbiol.* **5**, 796–812 (2020).
7. Mann, T. Z. *et al.* Breast milk transmission of flaviviruses in the context of Zika virus: A systematic review. *Paediatr. Perinat. Epidemiol.* **32**, 358–368 (2018).
8. Blohm, G. M. *et al.* Evidence for Mother-to-Child Transmission of Zika Virus Through Breast Milk. *Clin. Infect. Dis.* **66**, 1120–1121 (2018).
9. Cavalcanti, M. G. *et al.* Zika virus shedding in human milk during lactation: an unlikely source of infection? *Int. J. Infect. Dis.* **57**, 70–72 (2017).
10. Amara, A. & Mercer, J. Viral apoptotic mimicry. *Nat. Rev. Microbiol.* **13**, 461–469 (2015).
11. Grobusch, M. P. *et al.* Can dengue virus be sexually transmitted? *Travel Med. Infect. Dis.* **38**, 101753 (2020).
12. Humaidi, M., Tien, W. P., Yap, G., Chua, C. R. & Ng, L. C. Non-Invasive Dengue Diagnostics—The Use of Saliva and Urine for Different Stages of the Illness. *Diagnostics* **11**, 1345 (2021).
13. Limeres Posse, J., Diz Dios, P. & Scully, C. Viral Diseases Transmissible by Kissing. in *Saliva Protection and Transmissible Diseases* 53–92 (Elsevier, 2017). doi:10.1016/B978-0-12-813681-2.00004-4.
14. Matangkasombut, P. *et al.* Dengue viremia kinetics in asymptomatic and symptomatic infection. *Int. J. Infect. Dis.* **101**, 90–97 (2020).
15. Kuno, G. & Chang, G.-J. J. Biological Transmission of Arboviruses: Reexamination of and New Insights into Components, Mechanisms, and Unique Traits as Well as Their Evolutionary Trends. *Clin. Microbiol. Rev.* **18**, 608–637 (2005).
16. Colpitts, T. M., Conway, M. J., Montgomery, R. R. & Fikrig, E. West Nile Virus: Biology, Transmission, and Human Infection. *Clin. Microbiol. Rev.* **25**, 635–648 (2012).
17. Petersen, L. R., Brault, A. C. & Nasci, R. S. West Nile Virus: Review of the Literature. *JAMA* **310**, 308 (2013).
18. Barzon, L. *et al.* Isolation of West Nile Virus from Urine Samples of Patients with

- Acute Infection. *J. Clin. Microbiol.* **52**, 3411–3413 (2014).
19. Martins, E. B. *et al.* Detection of Chikungunya virus in bodily fluids: The INOVACHIK cohort study. *PLoS Negl. Trop. Dis.* **16**, e0010242 (2022).
  20. Burt, F. J. *et al.* Chikungunya virus: an update on the biology and pathogenesis of this emerging pathogen. *Lancet Infect. Dis.* **17**, e107–e117 (2017).
  21. Bala Murugan, S. & Sathishkumar, R. Chikungunya infection: A potential re-emerging global threat. *Asian Pac. J. Trop. Med.* **9**, 933–937 (2016).
  22. Campos, G. S. *et al.* First Detection of Chikungunya Virus in Breast Milk. *Pediatr. Infect. Dis. J.* **36**, 1015–1017 (2017).
  23. Jacob, S. T. *et al.* Ebola virus disease. *Nat. Rev. Dis. Prim.* **6**, 13 (2020).
  24. Vetter, P. *et al.* Ebola Virus Shedding and Transmission: Review of Current Evidence. *J. Infect. Dis.* **214**, S177–S184 (2016).
  25. Hoffmann, M. *et al.* SARS-CoV-2 Cell Entry Depends on ACE2 and TMPRSS2 and Is Blocked by a Clinically Proven Protease Inhibitor. *Cell* **181**, 271–280.e8 (2020).
  26. Gonzalez, D. C. *et al.* A Systematic Review on the Investigation of SARS-CoV-2 in Semen. *Res. Reports Urol. Volume 12*, 615–621 (2020).
  27. Huang, N. *et al.* SARS-CoV-2 infection of the oral cavity and saliva. *Nat. Med.* **27**, 892–903 (2021).
  28. Greenhalgh, T. *et al.* Ten scientific reasons in support of airborne transmission of SARS-CoV-2. *Lancet* **397**, 1603–1605 (2021).
  29. Jayaweera, M., Perera, H., Gunawardana, B. & Manatunge, J. Transmission of COVID-19 virus by droplets and aerosols: A critical review on the unresolved dichotomy. *Environ. Res.* **188**, 109819 (2020).
  30. Li, Y. & Li, J. Z. SARS-CoV-2 Virology. *Infect. Dis. Clin. North Am.* **36**, 251–265 (2022).
  31. Mawalla, W. F., Njiro, B. J., Bwire, G. M., Nasser, A. & Sunguya, B. No evidence of SARS-CoV-2 transmission through transfusion of human blood products: A systematic review. *eJHaem* **2**, 601–606 (2021).
  32. Centeno-Tablante, E. *et al.* Transmission of SARS-CoV-2 through breast milk and breastfeeding: a living systematic review. *Ann. N. Y. Acad. Sci.* **1484**, 32–54 (2021).
  33. Jones, D. L. *et al.* Shedding of SARS-CoV-2 in feces and urine and its potential role in person-to-person transmission and the environment-based spread of COVID-19. *Sci. Total Environ.* **749**, 141364 (2020).
  34. Deeks, S. G., Overbaugh, J., Phillips, A. & Buchbinder, S. HIV infection. *Nat. Rev. Dis. Prim.* **1**, 15035 (2015).
  35. Liuzzi, G. *et al.* Analysis of HIV-1 load in blood, semen and saliva: evidence for different viral compartments in a cross-sectional and longitudinal study. *AIDS* **10**, F51–F56 (1996).
  36. Levy, J. A. Pathogenesis of human immunodeficiency virus infection. *Microbiol. Rev.* **57**, 183–289 (1993).
  37. John-Stewart, G. *et al.* Breast-feeding and Transmission of HIV-1. *JAIDS J. Acquir. Immune Defic. Syndr.* **35**, 196–202 (2004).

38. Hamprecht, K. *et al.* Epidemiology of transmission of cytomegalovirus from mother to preterm infant by breastfeeding. *Lancet* **357**, 513–518 (2001).
39. Soares, M. M., King, S. W. & Thorpe, P. E. Targeting inside-out phosphatidylserine as a therapeutic strategy for viral diseases. *Nat. Med.* **14**, 1357–1362 (2008).
40. Handsfield, H. H. *et al.* Cytomegalovirus Infection in Sex Partners: Evidence for Sexual Transmission. *J. Infect. Dis.* **151**, 344–348 (1985).
41. Plosa, E. J., Esbenshade, J. C., Fuller, M. P. & Weitkamp, J.-H. Cytomegalovirus Infection. *Pediatr. Rev.* **33**, 156–163 (2012).
42. Juhl, D. *et al.* Detection of herpes simplex virus DNA in plasma of patients with primary but not with recurrent infection: implications for transfusion medicine? *Transfus. Med.* **20**, 38–47 (2010).
43. Madavaraju, K., Koganti, R., Volety, I., Yadavalli, T. & Shukla, D. Herpes Simplex Virus Cell Entry Mechanisms: An Update. *Front. Cell. Infect. Microbiol.* **10**, 1–18 (2021).
44. Brugha, R., Keersmaekers, K., Renton, A. & Meheus, A. Genital herpes infection: a review. *Int. J. Epidemiol.* **26**, 698–709 (1997).
45. Atyeo, N., Rodriguez, M. D., Papp, B. & Toth, Z. Clinical Manifestations and Epigenetic Regulation of Oral Herpesvirus Infections. *Viruses* **13**, 681 (2021).
46. Barth, H., Liang, T. J. & Baumert, T. F. Hepatitis C virus entry: Molecular biology and clinical implications. *Hepatology* **44**, 527–535 (2006).
47. Rooney, G. & Gilson, R. J. Sexual transmission of hepatitis C virus infection. *Sex. Transm. Infect.* **74**, 399–404 (1998).
48. Terrault, N. A. Sexual activity as a risk factor for hepatitis C. *Hepatology* **36**, s99–s105 (2002).
49. Edwards, S. & Carne, C. Oral sex and the transmission of viral STIs. *Sex. Transm. Infect.* **74**, 6–10 (1998).
50. Ferreira, M., Dios, P. & Scully, C. Transmission of hepatitis C virus by saliva? *Oral Dis.* **11**, 230–235 (2005).
51. Prati, D. Transmission of hepatitis C virus by blood transfusions and other medical procedures: A global review. *J. Hepatol.* **45**, 607–616 (2006).
52. Bhola, K. & McGuire, W. Does avoidance of breast feeding reduce mother-to-infant transmission of hepatitis C virus infection? *Arch. Dis. Child.* **92**, 365–366 (2007).
53. Lu, T. *et al.* Quantitative detection of hepatitis C virus RNA in urine of patients with chronic hepatitis C using a novel real-time PCR assay. *J. Med. Virol.* **91**, 115–123 (2019).
54. Choi, J.-Y. *et al.* A novel fluorescence assay for measuring phosphatidylserine decarboxylase catalysis. *J. Biol. Chem.* **293**, 1493–1503 (2018).
55. Choi, J.-Y., Augagneur, Y., Mamoun, C. Ben & Voelker, D. R. Identification of Gene Encoding Plasmodium knowlesi Phosphatidylserine Decarboxylase by Genetic Complementation in Yeast and Characterization of in Vitro Maturation of Encoded Enzyme. *J. Biol. Chem.* **287**, 222–232 (2012).
56. Proffitt, M. R. & Schindler, S. A. Rapid detection of HSV with an enzyme-linked

- virus inducible system<sup>TM</sup> (ELVIS<sup>TM</sup>) employing a genetically modified cell line. *Clin. Diagn. Virol.* **4**, 175–182 (1995).
57. Tsetsarkin, K. *et al.* Infectious Clones of Chikungunya Virus (La Réunion Isolate) for Vector Competence Studies. *Vector-Borne Zoonotic Dis.* **6**, 325–337 (2006).
  58. Fischl, W. & Bartenschlager, R. High-Throughput Screening Using Dengue Virus Reporter Genomes. in *Methods in molecular biology (Clifton, N.J.)* vol. 1030 205–219 (2013).
  59. Watt, A. *et al.* A Novel Life Cycle Modeling System for Ebola Virus Shows a Genome Length-Dependent Role of VP24 in Virus Infectivity. *J. Virol.* **88**, 10511–10524 (2014).
  60. Sinzger, C. *et al.* Cloning and sequencing of a highly productive, endotheliotropic virus strain derived from human cytomegalovirus TB40/E. *J. Gen. Virol.* **89**, 359–368 (2008).
  61. Hofmann, S. *et al.* Complex lipid metabolic remodeling is required for efficient hepatitis C virus replication. *Biochim. Biophys. Acta - Mol. Cell Biol. Lipids* **1863**, 1041–1056 (2018).
  62. Papkalla, A., Münch, J., Otto, C. & Kirchhoff, F. Nef enhances human immunodeficiency virus type 1 infectivity and replication independently of viral coreceptor tropism. *J. Virol.* **76**, 8455–9 (2002).
  63. Weil, T. *et al.* Advanced Molecular Tweezers with Lipid Anchors against SARS-CoV-2 and Other Respiratory Viruses. *JACS Au* **2**, 2187–2202 (2022).

## Gating strategy

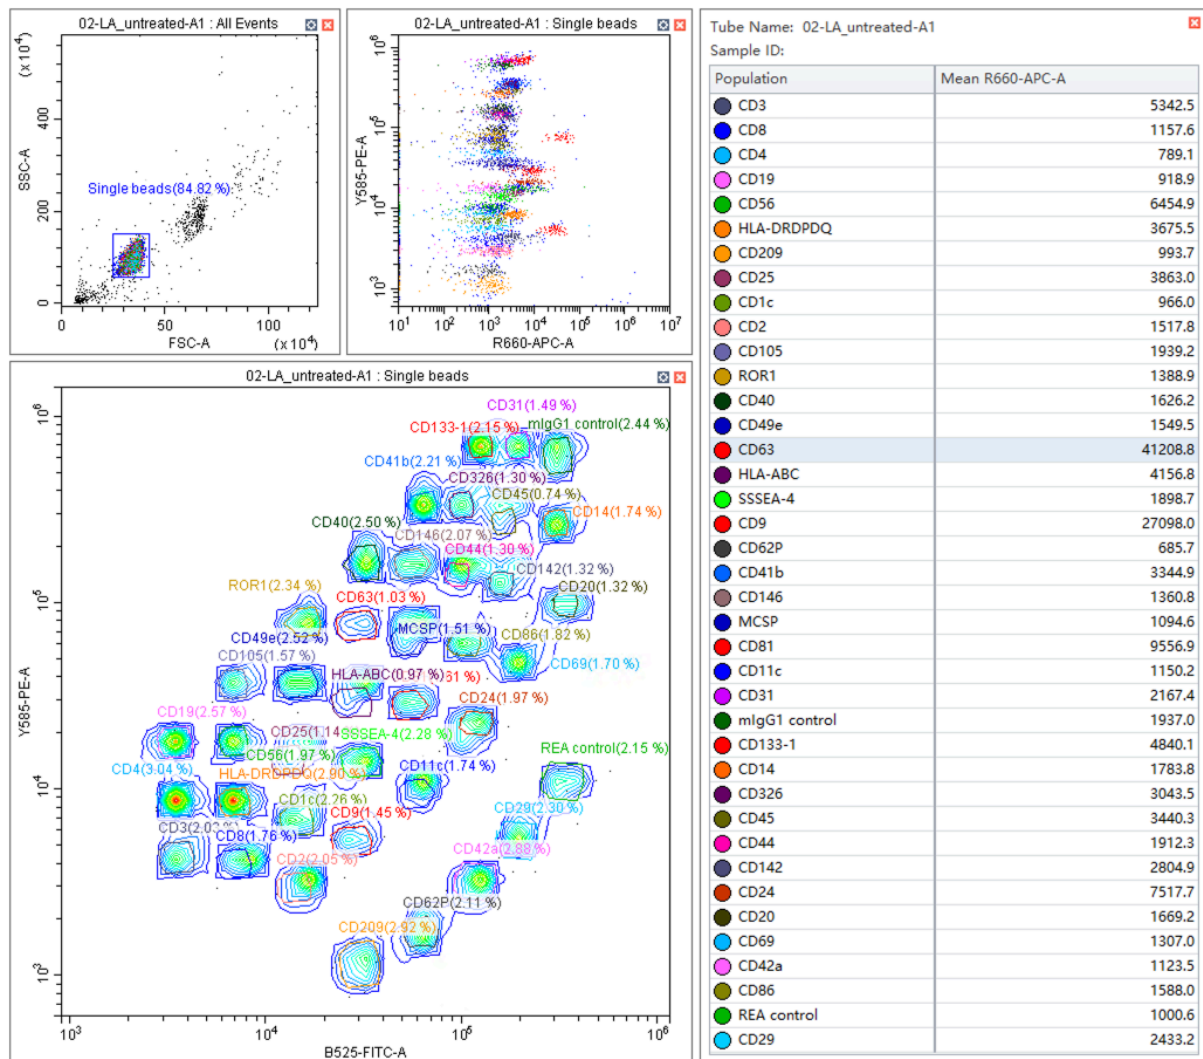

**Gating strategy for bead-assisted flow cytometry as shown in Figure 3H, 4G, Extended Data Figure 4E. Representative raw data of EV-exposed PS using fluorescently tagged lactadherin.** Single beads are first gated by SSC/FSC-A (top left) and individual beads containing antibodies directed against typical EV surface markers then separated by their endogenous PE/FITC-signal, enabling discrimination of 39 bead populations (37 markers + 2 isotype controls, large graph). The mean R660-APC/Alexa Fluoro 647 fluorescence intensity of each bead population is then analyzed to reveal the proportion of PS-containing vesicles which simultaneously carry the protein marker of respective beads. Performed according to Wiklander et al. Systematic Methodological Evaluation of a Multiplex Bead-Based Flow Cytometry Assay for Detection of Extracellular Vesicle Surface Signatures. *Front. Immunol.* 9, 1326 (2018).



# Uncut western blots

**A**

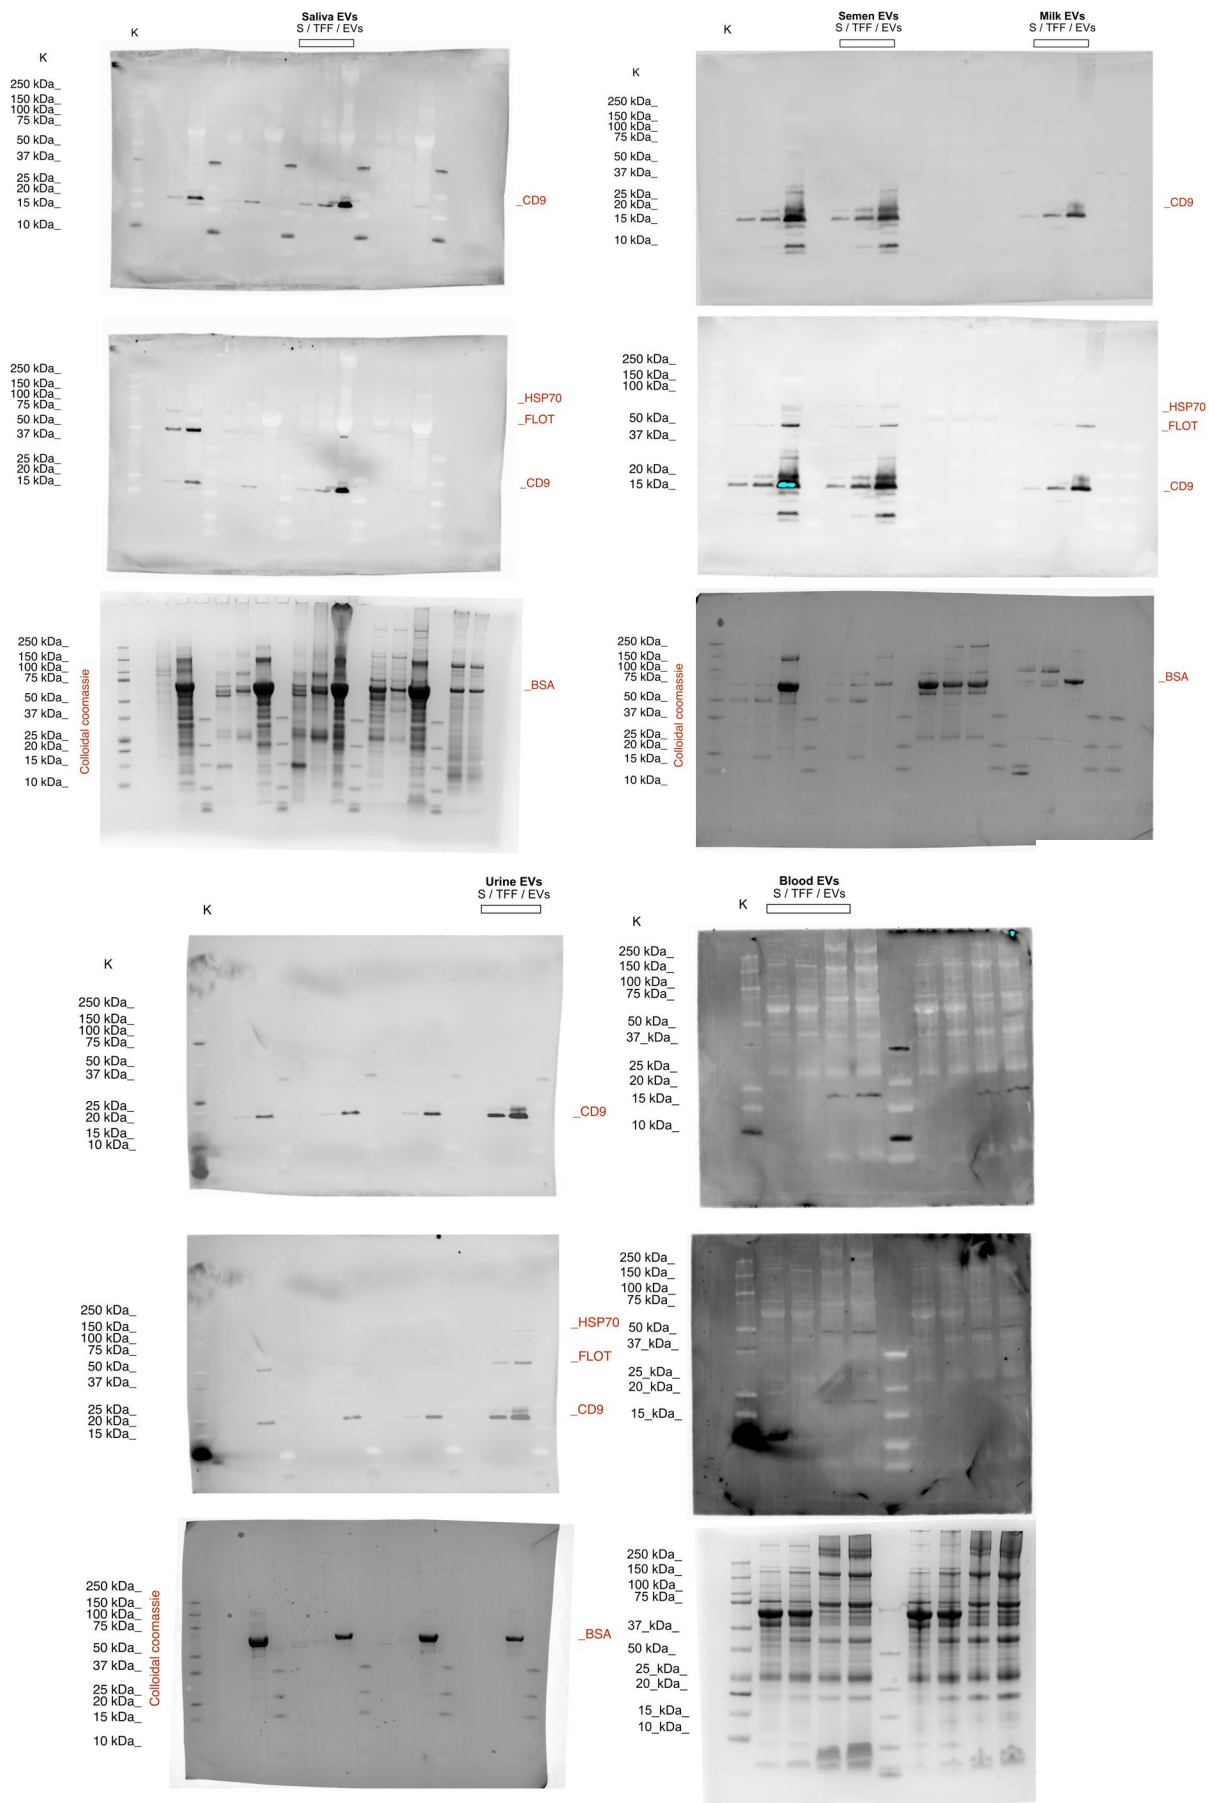

**B**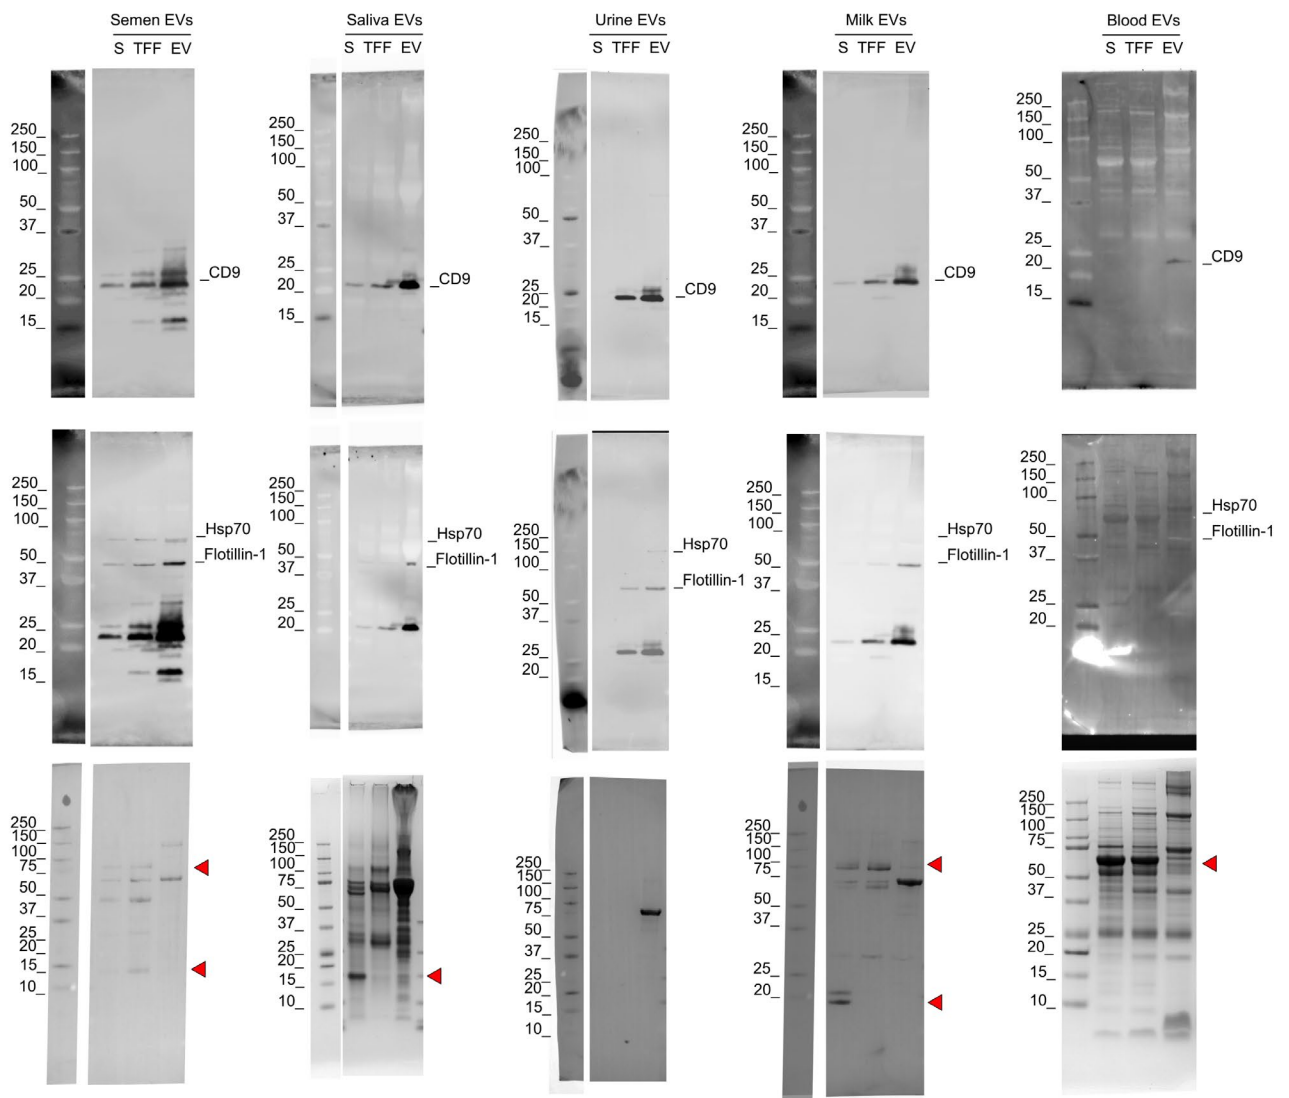

**Uncut western blot membranes and total protein stain corresponding to cropped images shown in Figure 3B.** Protein concentrations are 1  $\mu\text{g}/\text{lane}$  (urine), 10  $\mu\text{g}/\text{lane}$  (seminal plasma, breast milk, saliva, serum). For urine, the source fluid contained undetectable ( $< 25 \mu\text{g}/\text{ml}$ ) protein levels and was thus used undiluted; TFF and BE-SEC fractions loaded are 1  $\mu\text{g}/\text{lane}$  protein. For all preparations, membranes were stained for EV marker proteins CD9, Hsp70 and flotillin-1. Separate gels were stained for total protein by colloidal Coomassie (bottom row). Note that after determining protein concentrations, all EV preparations were supplemented with BSA (0.1%, v/v) as a stabilizing agent (seen as a band at  $\sim 66 \text{ kDa}$  in total protein stain). For serum, a sample without added BSA was separated on SDS-PAGE to visualize loss of HSA by purification. Proteins abundant in source fluids with notable reduction after TFF/BE-SEC are indicated by red triangles. Shown are A) uncut membranes and with B) and relevant lanes and markers.

## Resource Table

| REAGENT or RESOURCE                                                            | SOURCE                          | IDENTIFIER                            |
|--------------------------------------------------------------------------------|---------------------------------|---------------------------------------|
| <b>Antibodies</b>                                                              |                                 |                                       |
| Anti-Flavivirus group antigen [D1-4G2-4-15 (4G2)]                              | Absolute Antibodies             | Cat. # Ab00230-2.0<br>RRID:AB_2715504 |
| CD9 (D8O1A) Rabbit mAb 13174                                                   | Cell Signaling Technology       | Cat. # 13174<br>RRID: AB_2798139      |
| Flotillin-1 (D2V7J) XP® Rabbit mAb 18634                                       | Cell Signaling Technology       | Cat. # 18634<br>RRID: AB_2773040      |
| Goat anti-Mouse IgG (H+L) Secondary Antibody, HRP                              | Thermo Fisher Scientific        | Cat. # 31430<br>RRID: AB_228307       |
| Goat anti-mouse (H+L) Alexa Fluor 488                                          | Thermo Fisher Scientific        | Cat. # A11001<br>RRID: AB_2534069     |
| Goat anti-Rabbit Affinity HRP                                                  | Thermo Fisher Scientific        | Cat. # 31460<br>RRID: AB_228341       |
| Goat anti-Mouse IgG (H+L) Superclonal Recombinant Secondary AB Alexa Fluor 647 | Thermo Fisher Scientific        | Cat. # A27029<br>RRID: AB_2536092     |
| Goat anti-rabbit IgG StarBright 520                                            | Bio-Rad                         | Cat. # 12005870<br>RRID: AB_2884949   |
| Goat anti-rabbit IgG StarBright 700                                            | Bio-Rad                         | Cat. # 12004162<br>RRID: AB_2721073   |
| HSP70 (D69) Antibody 4876                                                      | Cell Signaling Technology       | Cat. # 4876<br>RRID: AB_2119693       |
| SARS-CoV/SARS-CoV-2 N 40143-MM05 Mouse mAb                                     | SinoBiological                  | Cat. # 40143-MM05<br>RRID: AB_2827977 |
| Axl Monoclonal Antibody (DS7HAXL), PE                                          | Thermo Fisher Scientific        | Cat. 12-1087-42<br>RRID: AB_2723961   |
| CD9 (HI9a) FITC mouse mAb 312104                                               | Biolegend                       | Cat. # 312104<br>RRID: AB_2075894     |
| CD81 (TAPA-1) FITC mouse mAB 349504                                            | Biolegend                       | Cat. # 349504<br>RRID: AB_2075894     |
| CD63 (H5C6) FITC mouse mAB 353005                                              | Biolegend                       | Cat. # 353005<br>RRID: AB_10898319    |
| IgG1, κ (MOPC-21) mouse mAB 400109                                             | Biolegend                       | Cat. # 400109<br>RRID: AB_2861401     |
| IgG2a, κ (MOPC-173) mouse mAB 400207                                           | Biolegend                       | Cat. # 400207<br>RRID: AB_2884007     |
| <b>Chemicals, peptides, and recombinant proteins</b>                           |                                 |                                       |
| 18:1 (Δ9-Cis) PC (DOPC)                                                        | Avanti Polar Lipids             | Cat. # 850375C                        |
| 18:1 Cy5 PC                                                                    | Avanti Polar Lipids             | Cat. # 850483C                        |
| 18:1 PS (DOPS)                                                                 | Avanti Polar Lipids             | Cat. # 840035C                        |
| Bovine Lactadherin Alexa 647                                                   | Haematologic Technologies, Inc. | Cat. # BLAC-ALEXA647                  |
| BSA                                                                            | Gibco                           | Cat. # 15260-037                      |
| Choline                                                                        | Sigma Aldrich                   | Cat. # C7527                          |
| Chloroform                                                                     | Sigma Aldrich                   | Cat. # 34854                          |

|                                                 |                          |                                 |
|-------------------------------------------------|--------------------------|---------------------------------|
| Clarity Max Western ECL Substrate               | Bio-Rad                  | Cat. # 1705062                  |
| DSB-3                                           | Bunz Lab                 | Choi et al., 2018 <sup>54</sup> |
| DPBS                                            | Gibco                    | Cat. # 14190-144                |
| Dulbecco's Modified Eagle Medium (DMEM)         | Gibco                    | Cat. # 41965039                 |
| Fetal bovine serum (FBS)                        | Gibco                    | Cat. # 10270106                 |
| GelCode Blue                                    | Thermo Fisher Scientific | Cat. # 24590                    |
| HEPES                                           | Gibco                    | Cat. # 15630-080                |
| Hoechst 33342                                   | Thermo Fisher Scientific | Cat. # H1399                    |
| Immobilon-FL PVDF                               | Merck                    | Cat. # IPFL00010                |
| Isopropanol                                     | Sigma Aldrich            | Cat. # 33539                    |
| L-Glutamine                                     | PAN-Biotech              | Cat. # P04-80100                |
| Methanol                                        | Sigma Aldrich            | Cat. # 32213                    |
| Methyl acetate                                  | Sigma Aldrich            | Cat. # 8.09711.100              |
| Methyl- $\alpha$ -cyclodextrin                  | AraChem                  | Cat. # CDexA-076/BR             |
| Non-essential amino acids                       | Gibco                    | Cat. # 11140-050                |
| NuPAGE 4-12% BisTris gels                       | Thermo Fisher Scientific | Cat. # NP032                    |
| Paraformaldehyde 4%                             | VWR Chemicals            | Cat. # 20910.294                |
| Penicillin-Streptomycin                         | PAN-Biotech              | Cat. # P06-07050                |
| Phosphoserine                                   | Selleckchem              | Cat. # S5137                    |
| Phospholipase D from <i>Streptomyces c.</i>     | Sigma Aldrich            | Cat. # P0065                    |
| PS decarboxylase His6- $\Delta$ 34PkPSD         | Voelker lab              | Choi et al., 2012 <sup>55</sup> |
| Serine                                          | Sigma Aldrich            | Cat. # S4500                    |
| Sodium chloride                                 | Sigma Aldrich            | Cat. # 1.06404                  |
| Sodium hydroxide                                | Sigma Aldrich            | Cat. # 415413                   |
| Sodium pyruvate                                 | Gibco                    | Cat. # 11360-070                |
| Sulfuric acid                                   | Merck                    | Cat. # 1007311000               |
| TMB substrate                                   | SeraCare                 | Cat. # 5120-0078                |
| TopFluor® PC                                    | Avanti Polar Lipids      | Cat. # 810281C                  |
| Tris(2-carboxyethyl)phosphine                   | Sigma Aldrich            | Cat. # 646547                   |
| Triton X-100                                    | Sigma Aldrich            | Cat. # T9284                    |
| Trypsin-EDTA                                    | PAN-Biotech              | Cat. # P10-023100               |
| Trypsin-EDTA                                    | Gibco                    | Cat. # 25200-072                |
| Tween-20                                        | Sigma Aldrich            | Cat. # P7949                    |
| <b>Critical commercial assays</b>               |                          |                                 |
| CellTiter-Glo® Luminescent Cell Viability Assay | Promega                  | Cat. # G7571                    |
| MACSPlex Exosome Kit, human                     | Miltenyi Biotec          | Cat. # 130-108-813              |
| Pierce™ Rapid Gold BCA Protein Assay Kit        | Thermo Fisher Scientific | Cat. # A53225                   |
| TaqMan™ Fast Virus 1-Step Master Mix            | Thermo Fisher Scientific | Cat. # 4444436                  |
| LysoTracker™ Green DND-26                       | Thermo Fisher Scientific | Cat. # L7526                    |

| <b>Experimental models: Cell lines</b>        |                                                                                                                        |                                                  |
|-----------------------------------------------|------------------------------------------------------------------------------------------------------------------------|--------------------------------------------------|
| BHK-21                                        | ATCC                                                                                                                   | Cat. # CCL-10                                    |
| Calu-3                                        | ATCC                                                                                                                   | Cat. # HTB-55                                    |
| ELVIS™                                        | ATCC                                                                                                                   | Proffitt <i>et al.</i> , 1995 <sup>56</sup>      |
| HEK293T                                       | ATCC                                                                                                                   | Cat# CRL3216                                     |
| HFF                                           | J. von Einem, Ulm<br>University Medical Center                                                                         | N/A                                              |
| Huh-7                                         | R. Bartenschlager,<br>Heidelberg University                                                                            | N/A                                              |
| TZM-bl                                        | NIBSC                                                                                                                  | Cat. # ARP5011                                   |
| Vero E6                                       | ATCC                                                                                                                   | Cat. # CRL-1586                                  |
| <b>Experimental models: Organisms/strains</b> |                                                                                                                        |                                                  |
| CHIKV                                         | G. Simmons, UCSF                                                                                                       | Tsetsarkin <i>et al.</i> ,<br>2006 <sup>57</sup> |
| DENV-R2a                                      | N/A                                                                                                                    | Fischl <i>et al.</i> , 2013 <sup>58</sup>        |
| EBOV-trVLP                                    | Poehlmann Lab, GPC<br>Göttingen                                                                                        | Watt <i>et al.</i> , 2014 <sup>59</sup>          |
| <i>Ex vivo</i> vaginal tissue                 | OB/GYN Clinic, Ulm<br>University Medical Center                                                                        | N/A                                              |
| HCMV (TB40/E strain)                          | J. von Einem, Ulm<br>University Medical Center                                                                         | Sinzger <i>et al.</i> , 2008 <sup>60</sup>       |
| HCV (Jc1 <sup>p7-GLuc-2A-NS2</sup> )          | N/A                                                                                                                    | Hofmann <i>et al.</i> ,<br>2018 <sup>61</sup>    |
| HIV-1 92TH014                                 | A. Papkalla, University of<br>Erlangen                                                                                 | Papkalla <i>et al.</i> , 2002 <sup>62</sup>      |
| HSV-1 (F strain eGFP)                         | B. Kaufer, FU Berlin                                                                                                   | N/A                                              |
| HSV-2 (333 strain eGFP)                       | P.G. Spear, NU Chicago                                                                                                 | N/A                                              |
| SARS-CoV-2 B.1.617.2                          | H. Streeck, University of<br>Cologne                                                                                   | Weil <i>et al.</i> , 2023 <sup>63</sup>          |
| VSV                                           | K.K. Conzelmann<br>(Ludwig-Maximilians-<br>University of Munich) and<br>S. Whelan (Washington<br>University St. Louis) | N/A                                              |
| ZIKV (FB-GWUH-2016 strain)                    | O. Vapalahti, University of<br>Helsinki                                                                                | N/A                                              |
| ZIKV (MR766 strain)                           | J. Schmidt-Chanasit,<br>Bernhard-Nocht-Institute<br>Hamburg                                                            | N/A                                              |

| <b>Oligonucleotides</b>                            |                           |                      |
|----------------------------------------------------|---------------------------|----------------------|
| ZIKV-F 5'-ACGGCYCTYGCTGGAGC-3'                     | Biomers.net               | N/A                  |
| ZIKV-R 5'-<br>GGAATATGACACRCCCTTCAAYCTAAG-3'       | Biomers.net               | N/A                  |
| ZIKV-P<br>FAM-AGGCTGAGATGGATGGTGCAAAGGG-<br>BNQ535 | Biomers.net               | N/A                  |
| <b>Software and algorithms</b>                     |                           |                      |
| GraphPad Prism 9.5.1 and 10.0.2                    | GraphPad Software, Inc    | www.graphpad.com     |
| FIJI Version 2.3.0                                 | N/A                       | www.imageJ.net/Fiji  |
| CytExpert Version 2.3.0.84                         | Beckman Coulter, Inc      | www.beckman.com      |
| Huygens Professional 19.10                         | Scientific Volume Imaging | www.svi.nl           |
| <b>Other</b>                                       |                           |                      |
| Extruder Set                                       | Avanti Polar Lipids       | Cat. # 610000        |
| TFF hollow-fibre module 300 kDa MWCO               | Repligen                  | Cat. # T06-E300-05-S |
| CaptoCore 700 BE-SEC                               | Cytiva                    | Cat. # 17548115      |
| Vivaspin 20 100 kDa MWCO                           | Sartorius                 | Cat. # VS2042        |
| Amicon Ultra-15 100 kDa MWCO                       | Sigma Aldrich             | Cat. # UFC9110096    |
| Amicon Ultra-0.5 10 kDa MWCO                       | Sigma Aldrich             | Cat. # UFC501024     |
| 0.2 µm syringe filter                              | Merck Millipore           | Cat. # SLGP033RB     |
| Stericup 0.22 µm PVDF                              | Merck Millipore           | Cat. # S2GVU05RE     |
| HPTLC (High Performance TLC) Glass Plates          | Sigma Aldrich             | Cat. # Z740222       |
| Hirschmann microcapillary pipette 1-5 µl           | Sigma Aldrich             | Cat. # Z611239       |
